# Supplementary material for: Neutrophils use superoxide to control bacterial infection at a distance
Source: PubMed Central journal article supplement (PMC6049935; doi:10.1371/journal.ppat.1007157), 2018-07-17

*E. coli*-DsRed injected in *tg(mpx:GFP)*

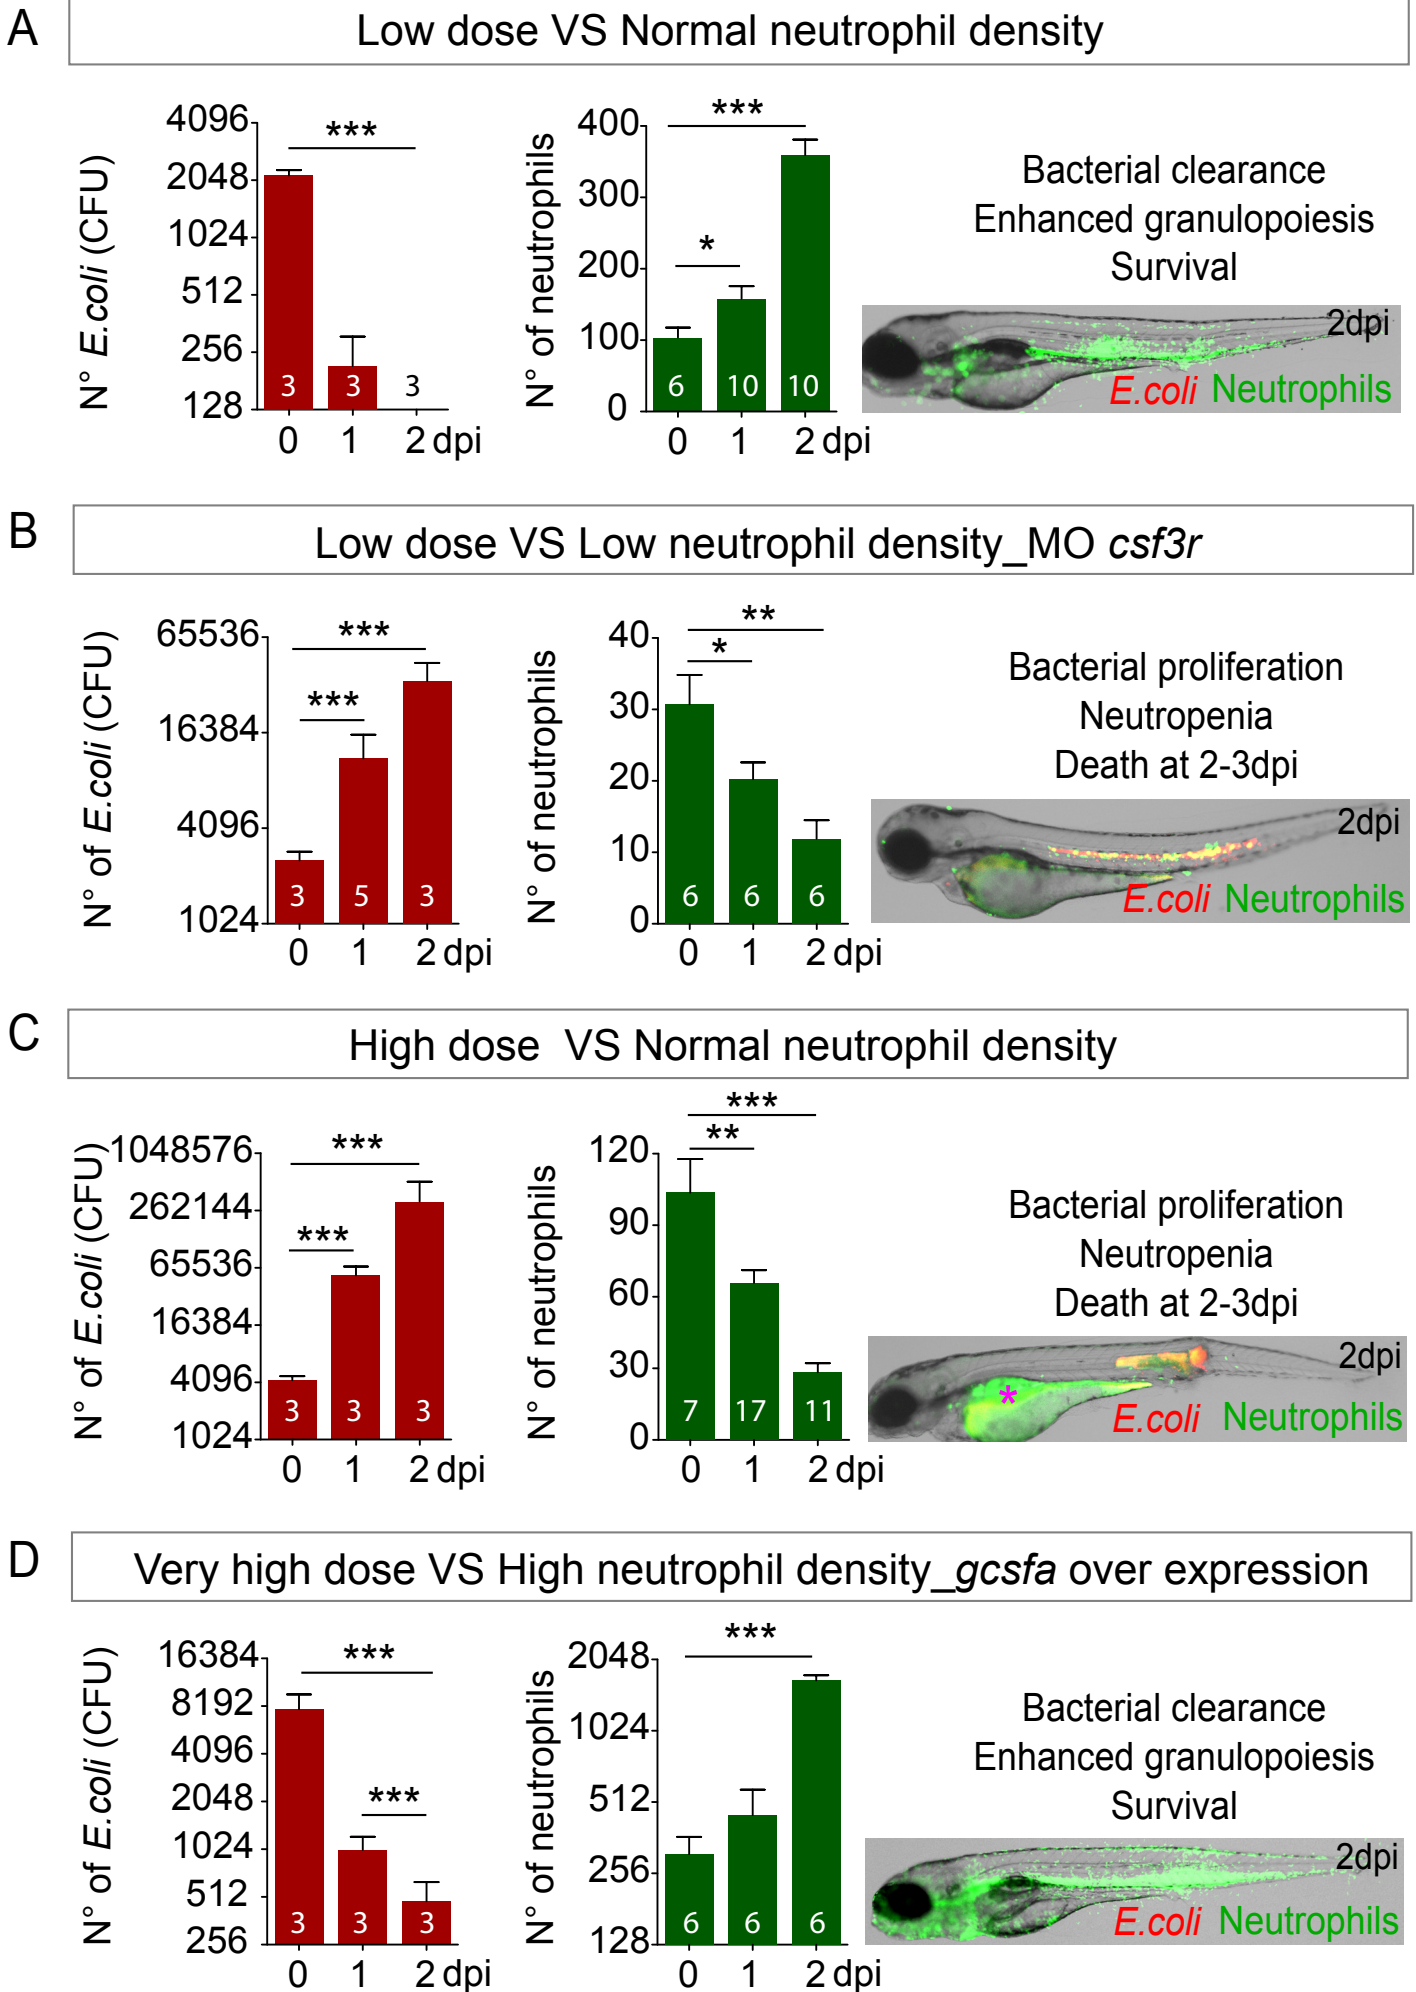

Supplement: ppat.1007157.s003.pdf [file ppat.1007157.s003.pdf]
