# Supplementary material for: Neutrophils use superoxide to control bacterial infection at a distance
Source: PubMed Central journal article supplement (PMC6049935; doi:10.1371/journal.ppat.1007157), 2018-07-17

A

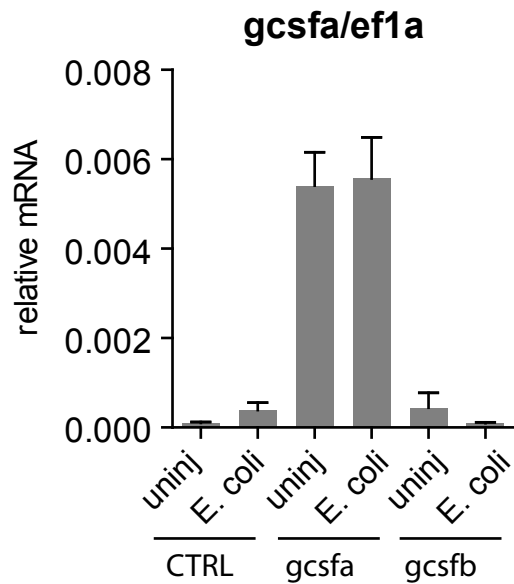

B

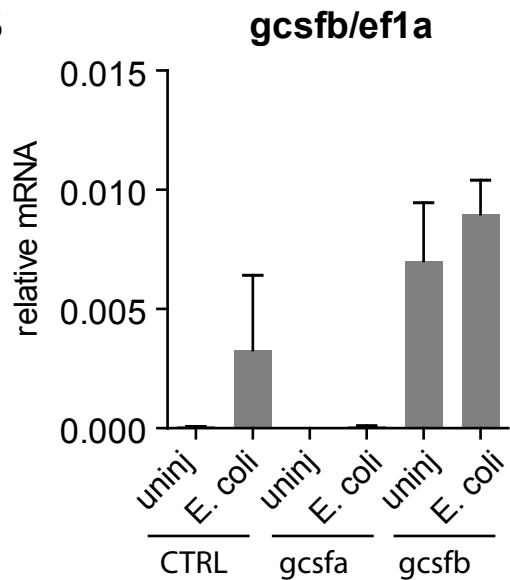

C

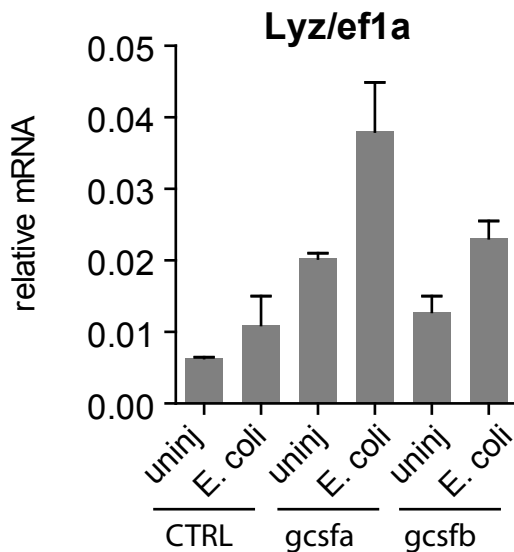

D

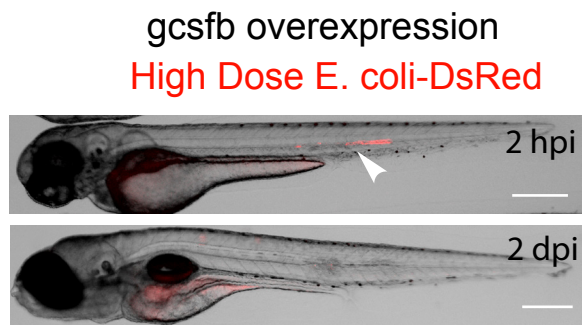

E

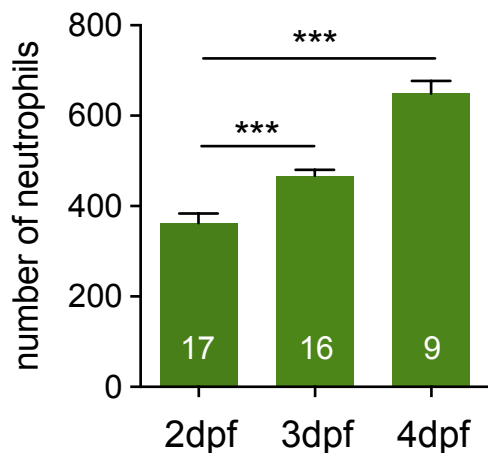

F

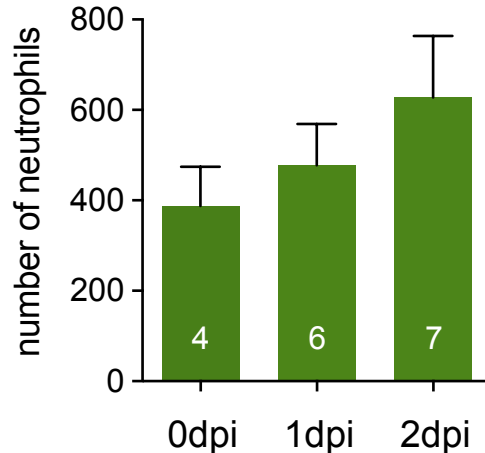

Supplement: ppat.1007157.s004.pdf [file ppat.1007157.s004.pdf]
