# Supplementary material for: Neutrophils use superoxide to control bacterial infection at a distance
Source: PubMed Central journal article supplement (PMC6049935; doi:10.1371/journal.ppat.1007157), 2018-07-17

*tg(lyz:DsRed)* Sytox Green

24hpi

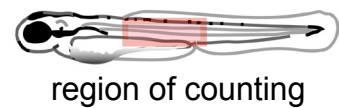

A

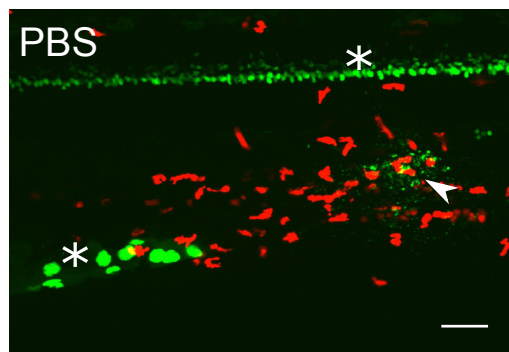

B

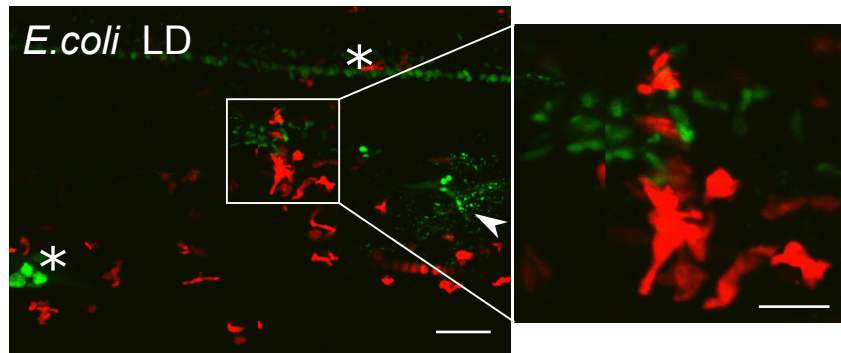

C

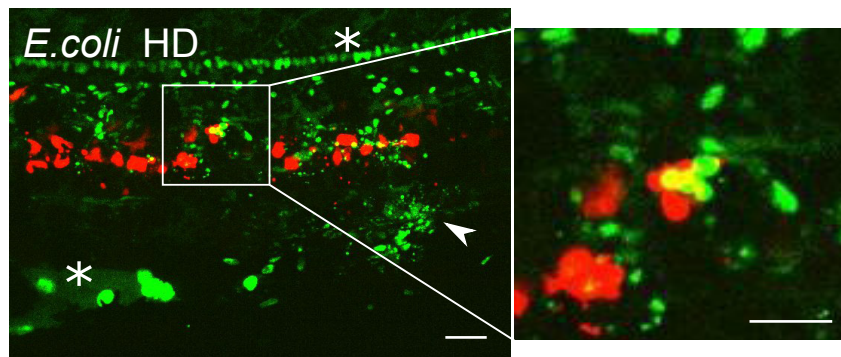

D

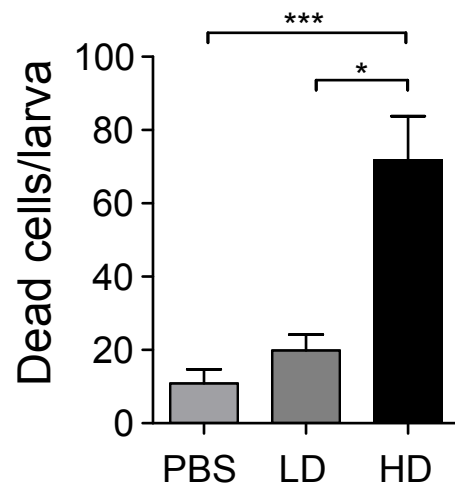

E

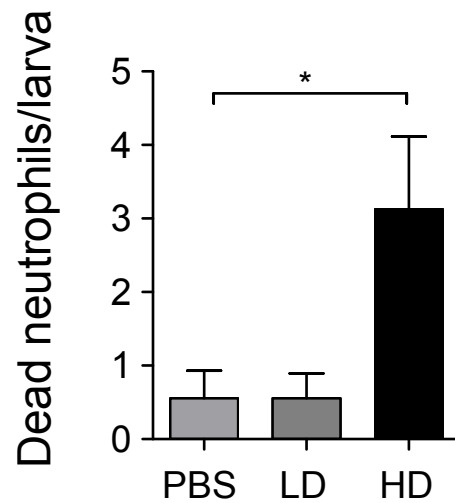

Supplement: ppat.1007157.s005.pdf [file ppat.1007157.s005.pdf]
