# Supplementary material for: Neutrophils use superoxide to control bacterial infection at a distance
Source: PubMed Central journal article supplement (PMC6049935; doi:10.1371/journal.ppat.1007157), 2018-07-17

**A** *Tg(lyz:DsRed)* *Salmonella Typhimurium* DAF-FM-DA 2dpi

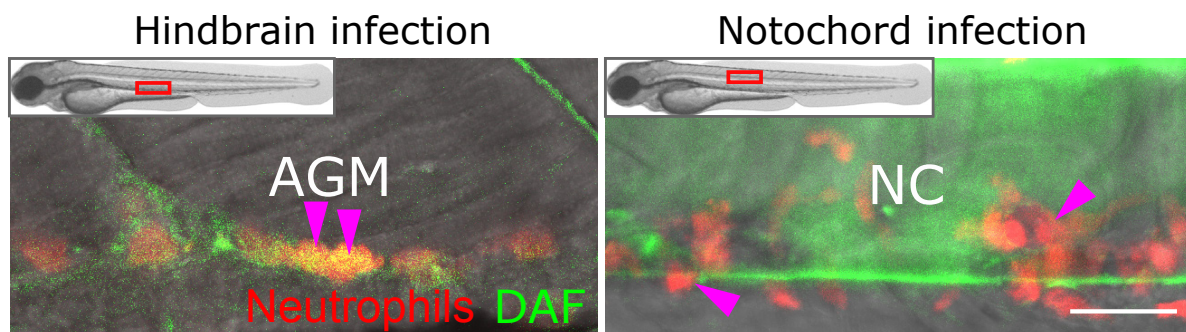

**B** *Tg(lyz:DsRed)* *E. coli-GFP* DAF-FM-DA 6 hpi

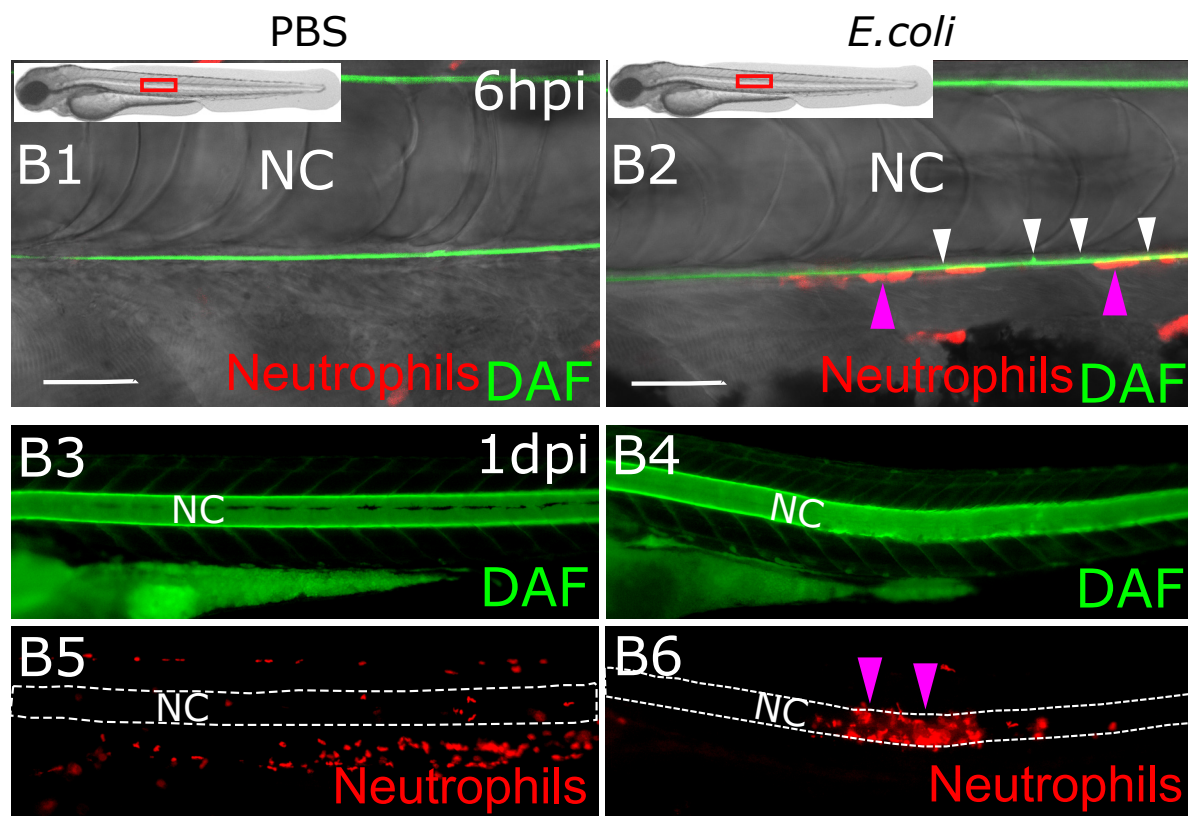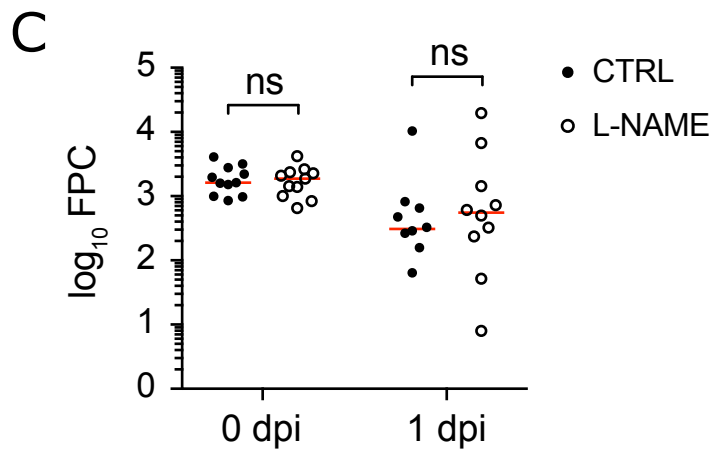

Supplement: ppat.1007157.s007.pdf [file ppat.1007157.s007.pdf]
