# Supplementary material for: Neutrophils use superoxide to control bacterial infection at a distance
Source: PubMed Central journal article supplement (PMC6049935; doi:10.1371/journal.ppat.1007157), 2018-07-17

A

*E.coli-DsRed*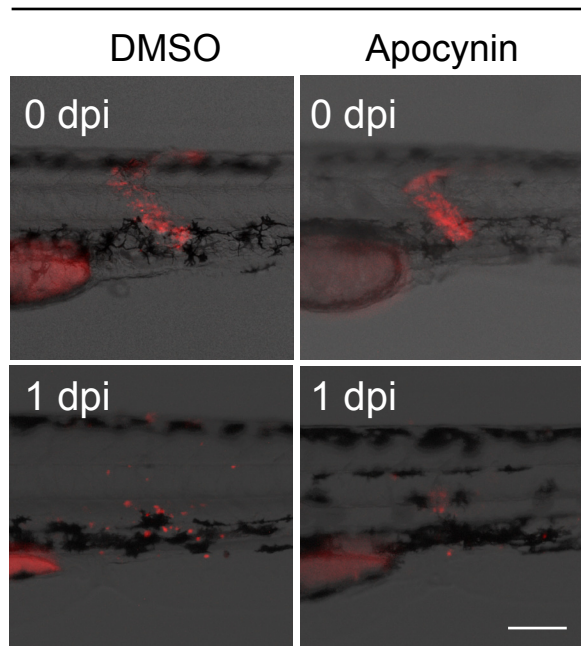

B

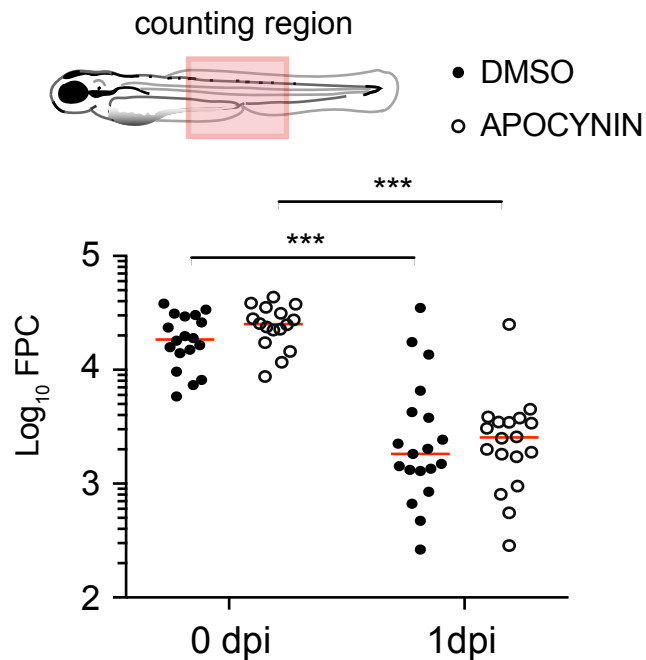

C

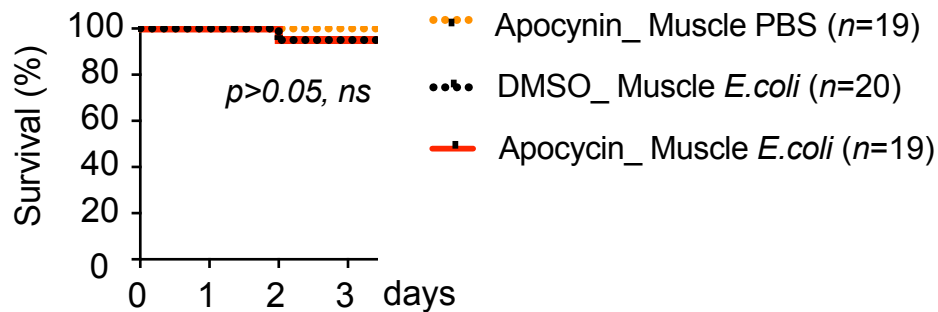

Supplement: ppat.1007157.s008.pdf [file ppat.1007157.s008.pdf]
