# Supplementary material for: Neutrophils use superoxide to control bacterial infection at a distance
Source: PubMed Central journal article supplement (PMC6049935; doi:10.1371/journal.ppat.1007157), 2018-07-17

**A***Tg(mpx:GFP) - E. coli-GFP*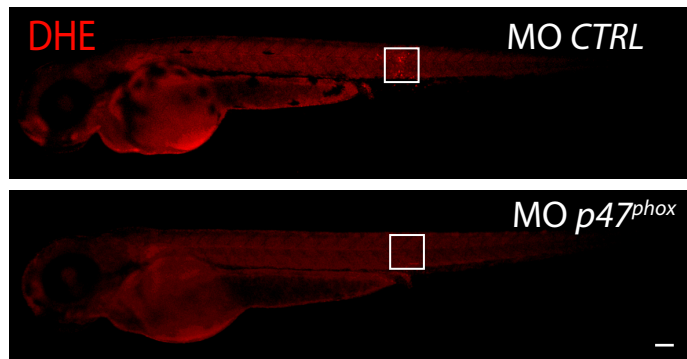**B***Tg(mpx:GFP) - E. coli-GFP*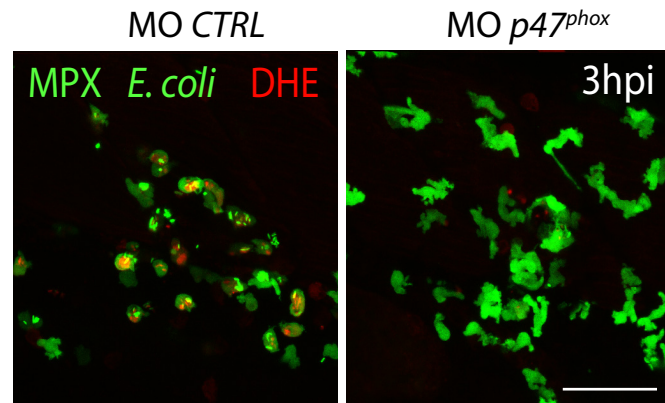**C**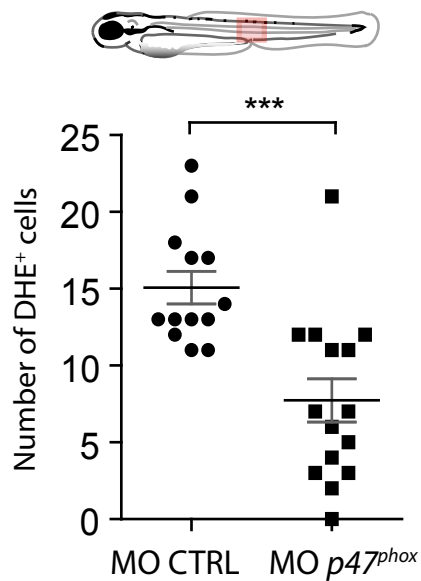**D**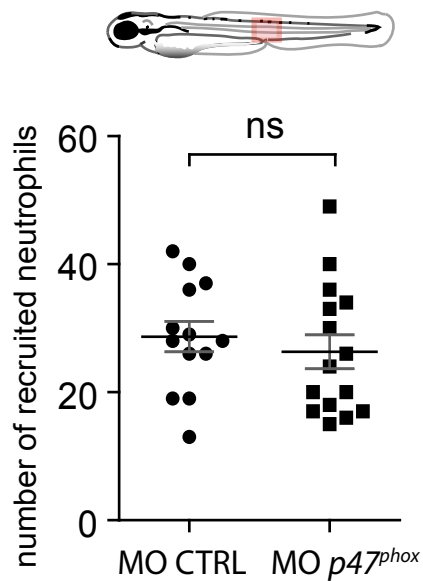**E**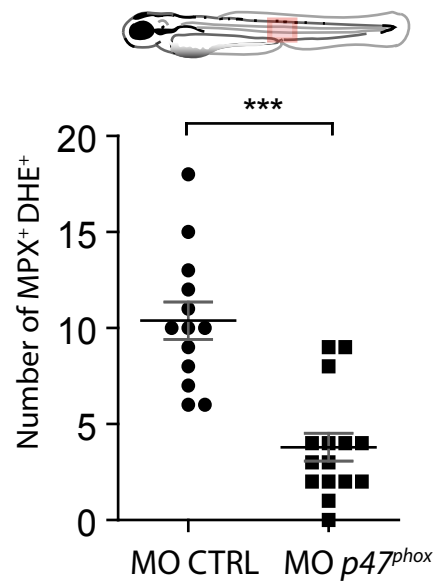

Supplement: ppat.1007157.s010.pdf [file ppat.1007157.s010.pdf]
